# Supplementary material for: Enhanced Desiccation Tolerance In Mature Cultures Of The Streptophytic Green Alga Zygnema circumcarinatum Revealed By Transcriptomics
Source: PubMed Central journal article supplement — Plant Cell Physiol. Author manuscript; Available in PMC 2017 Dec 8. (PMC5722205; doi:10.1093/pcp/pcx136), 2017-12-01
Supplement: NIHMS74381-supplement-Figure_S2.pdf [file NIHMS74381-supplement-Figure_S2.pdf]

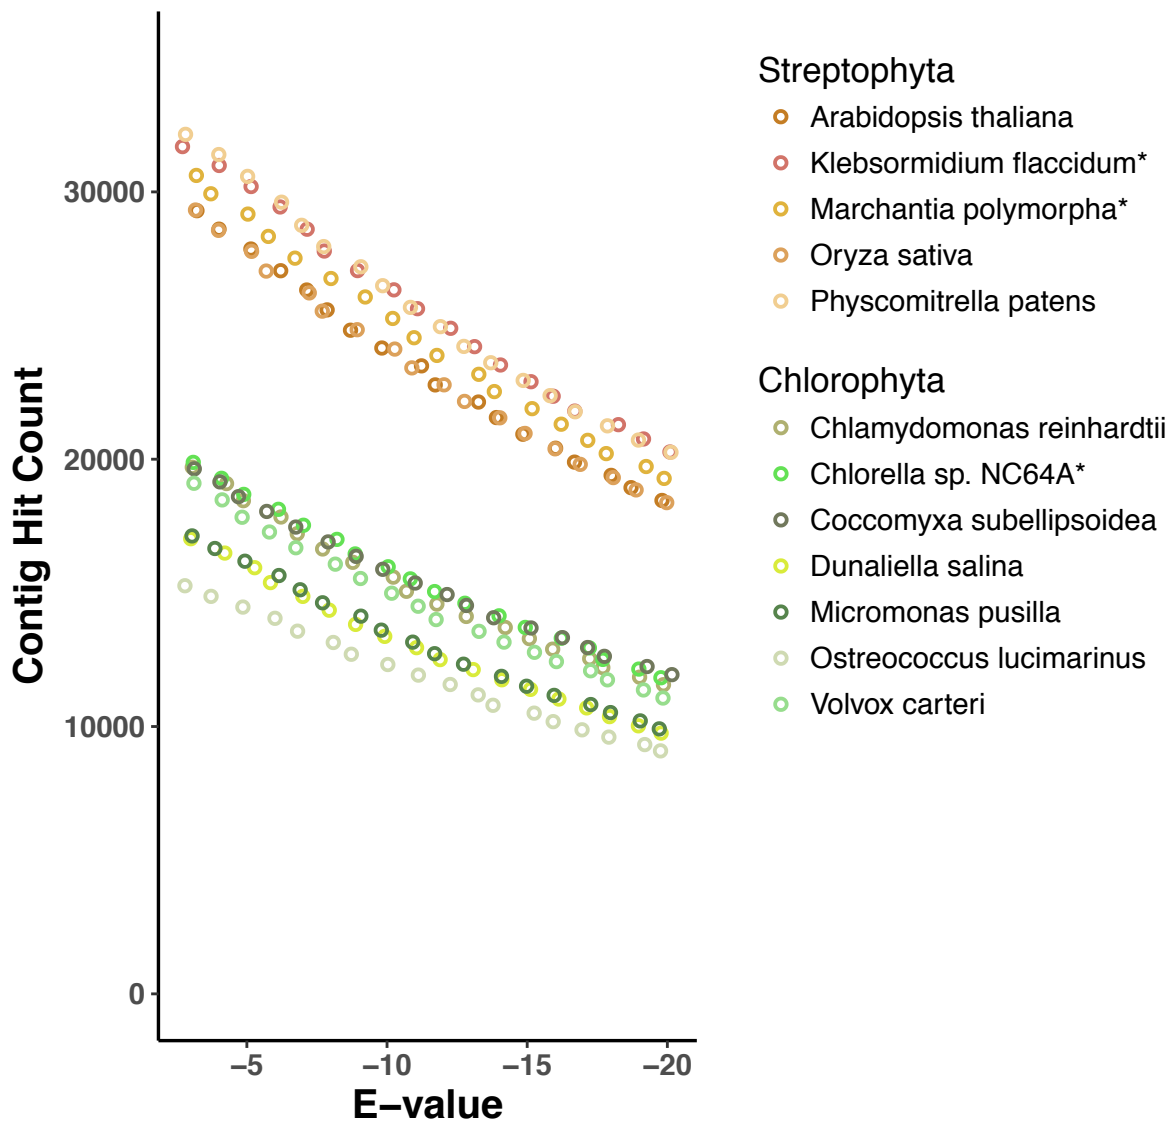

Figure S2. Diamond BLASTx Results against selected proteomes of streptophytes (S) and chlorophytes (C). The protein sequences of the following organisms were retrieved from Phytozome v11.0: *Arabidopsis thaliana* (S), *Chlamydomonas reinhardtii* (C), *Coccomyxa subellipsoidea* (C), *Dunaliella salina* (C), *Marchantia polymorpha* (S), *Micromonas pusilla* (C), *Oryza sativa* (S), *Ostreococcus lucimarinus* (C), *Physcomitrella patens* (S), *Volvox carteri* (C). Proteinsequences for *Chlorella* sp. NC64A (C) and *Klebsormidium flaccidum* (S) were downloaded from the JGI Genome Portal and the *Klebsormidium flaccidum* genome project, respectively (marked with asterisk). The hit count of *Zygnema* contigs against different e-values is plotted.
