# Supplementary material for: Enhanced Desiccation Tolerance In Mature Cultures Of The Streptophytic Green Alga Zygnema circumcarinatum Revealed By Transcriptomics
Source: PubMed Central journal article supplement — Plant Cell Physiol. Author manuscript; Available in PMC 2017 Dec 8. (PMC5722205; doi:10.1093/pcp/pcx136), 2017-12-01
Supplement: NIHMS74381-supplement-Figure_S4.pdf [file NIHMS74381-supplement-Figure_S4.pdf]

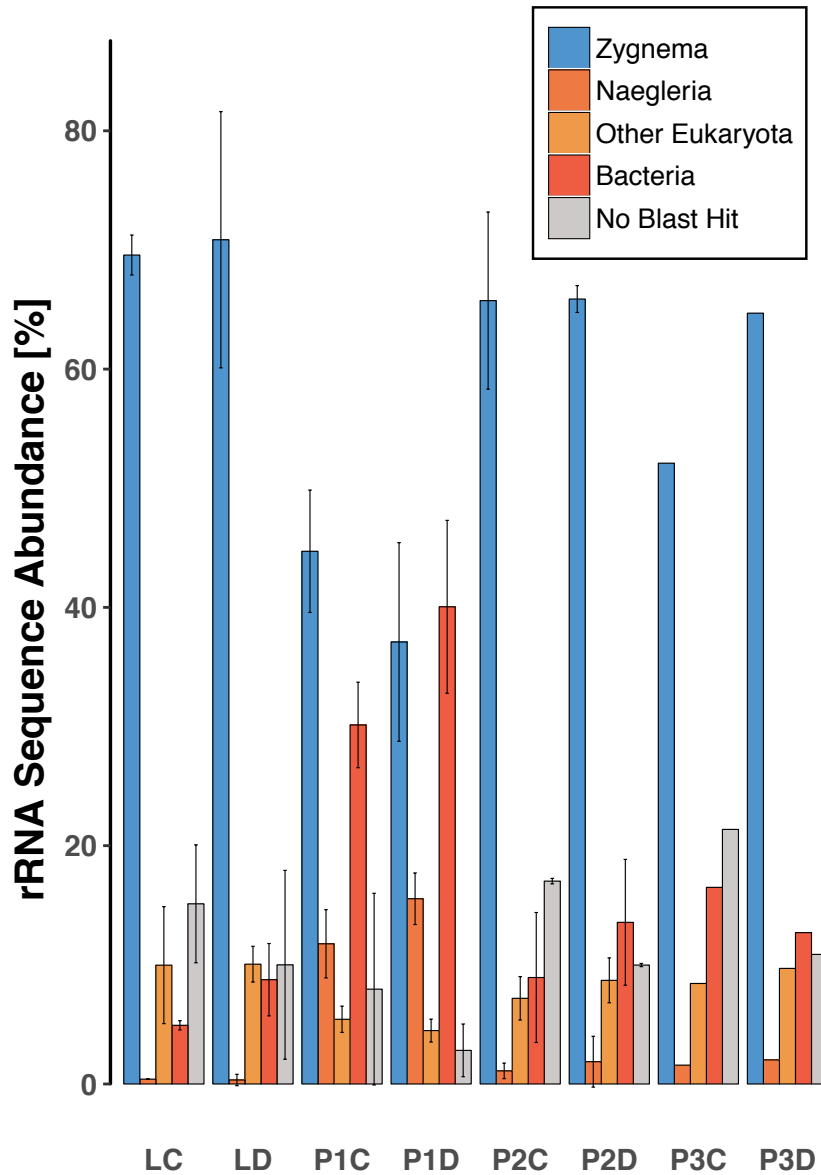

Figure S4. rRNA Sequence Abundance in all samples (LC, LD, P1C, P1D, P2C, P2D, P3C, P3D). Filtered rRNA small subunit sequence reads were clustered and annotated. According to each annotation the reads were summarized in five different groups (Zygnema, Naegleria, other Eukaryota, Bacteria, no BLAST hit) and the read count of each group per sample is displayed in %. Error bars show the standard deviation for each read count. The error bars for P3C and P3D are missing due to missing replicates.
