# Supplementary material for: Enhanced Desiccation Tolerance In Mature Cultures Of The Streptophytic Green Alga Zygnema circumcarinatum Revealed By Transcriptomics
Source: PubMed Central journal article supplement — Plant Cell Physiol. Author manuscript; Available in PMC 2017 Dec 8. (PMC5722205; doi:10.1093/pcp/pcx136), 2017-12-01
Supplement: NIHMS74381-supplement-Figure_S6.pdf [file NIHMS74381-supplement-Figure_S6.pdf]

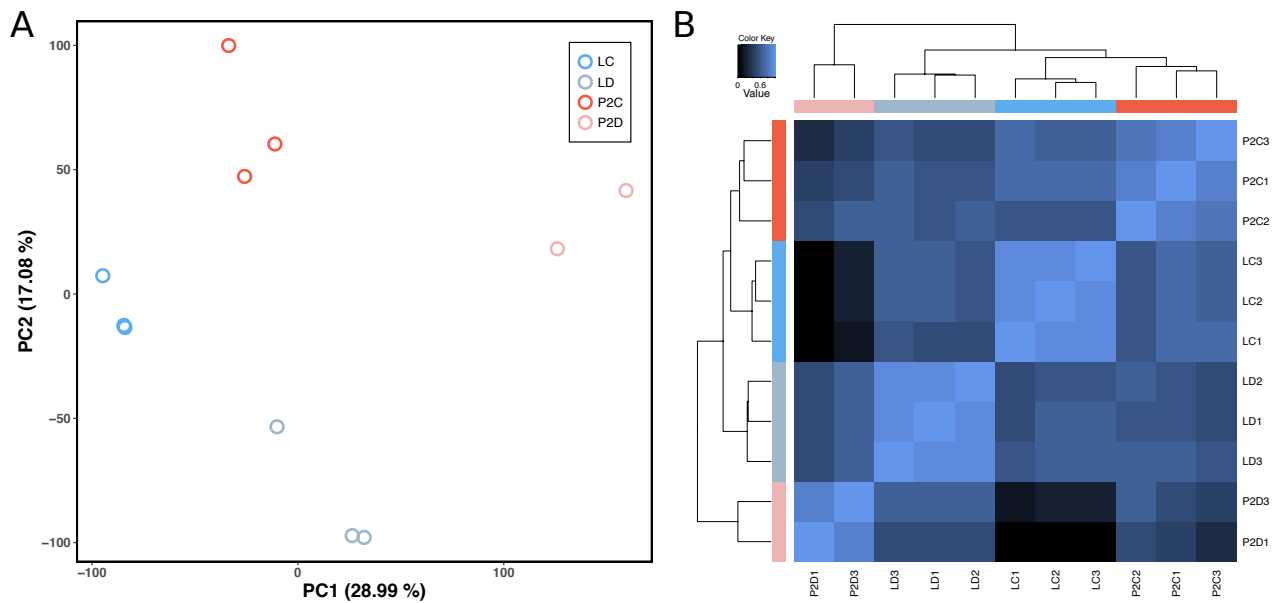

Figure S6. Replicate comparison across samples. A) Principal Component Analysis of the replicates of LC, LD, P2C and P2D based on the gene expression. B) Heatmap visualizing the sample correlation of LC, LD, P2C and P2D based on expression patterns (FDR  $\leq 0.05$ ) by means of a Pearson correlation measure. Strong correlation is indicated by light blue while a weaker correlation is depicted by darker shades.
