# Supplementary figures and images for: Enhanced Desiccation Tolerance In Mature Cultures Of The Streptophytic Green Alga Zygnema circumcarinatum Revealed By Transcriptomics
Source: PubMed Central journal article supplement — Plant Cell Physiol. Author manuscript; Available in PMC 2017 Dec 8. (PMC5722205; doi:10.1093/pcp/pcx136), 2017-12-01

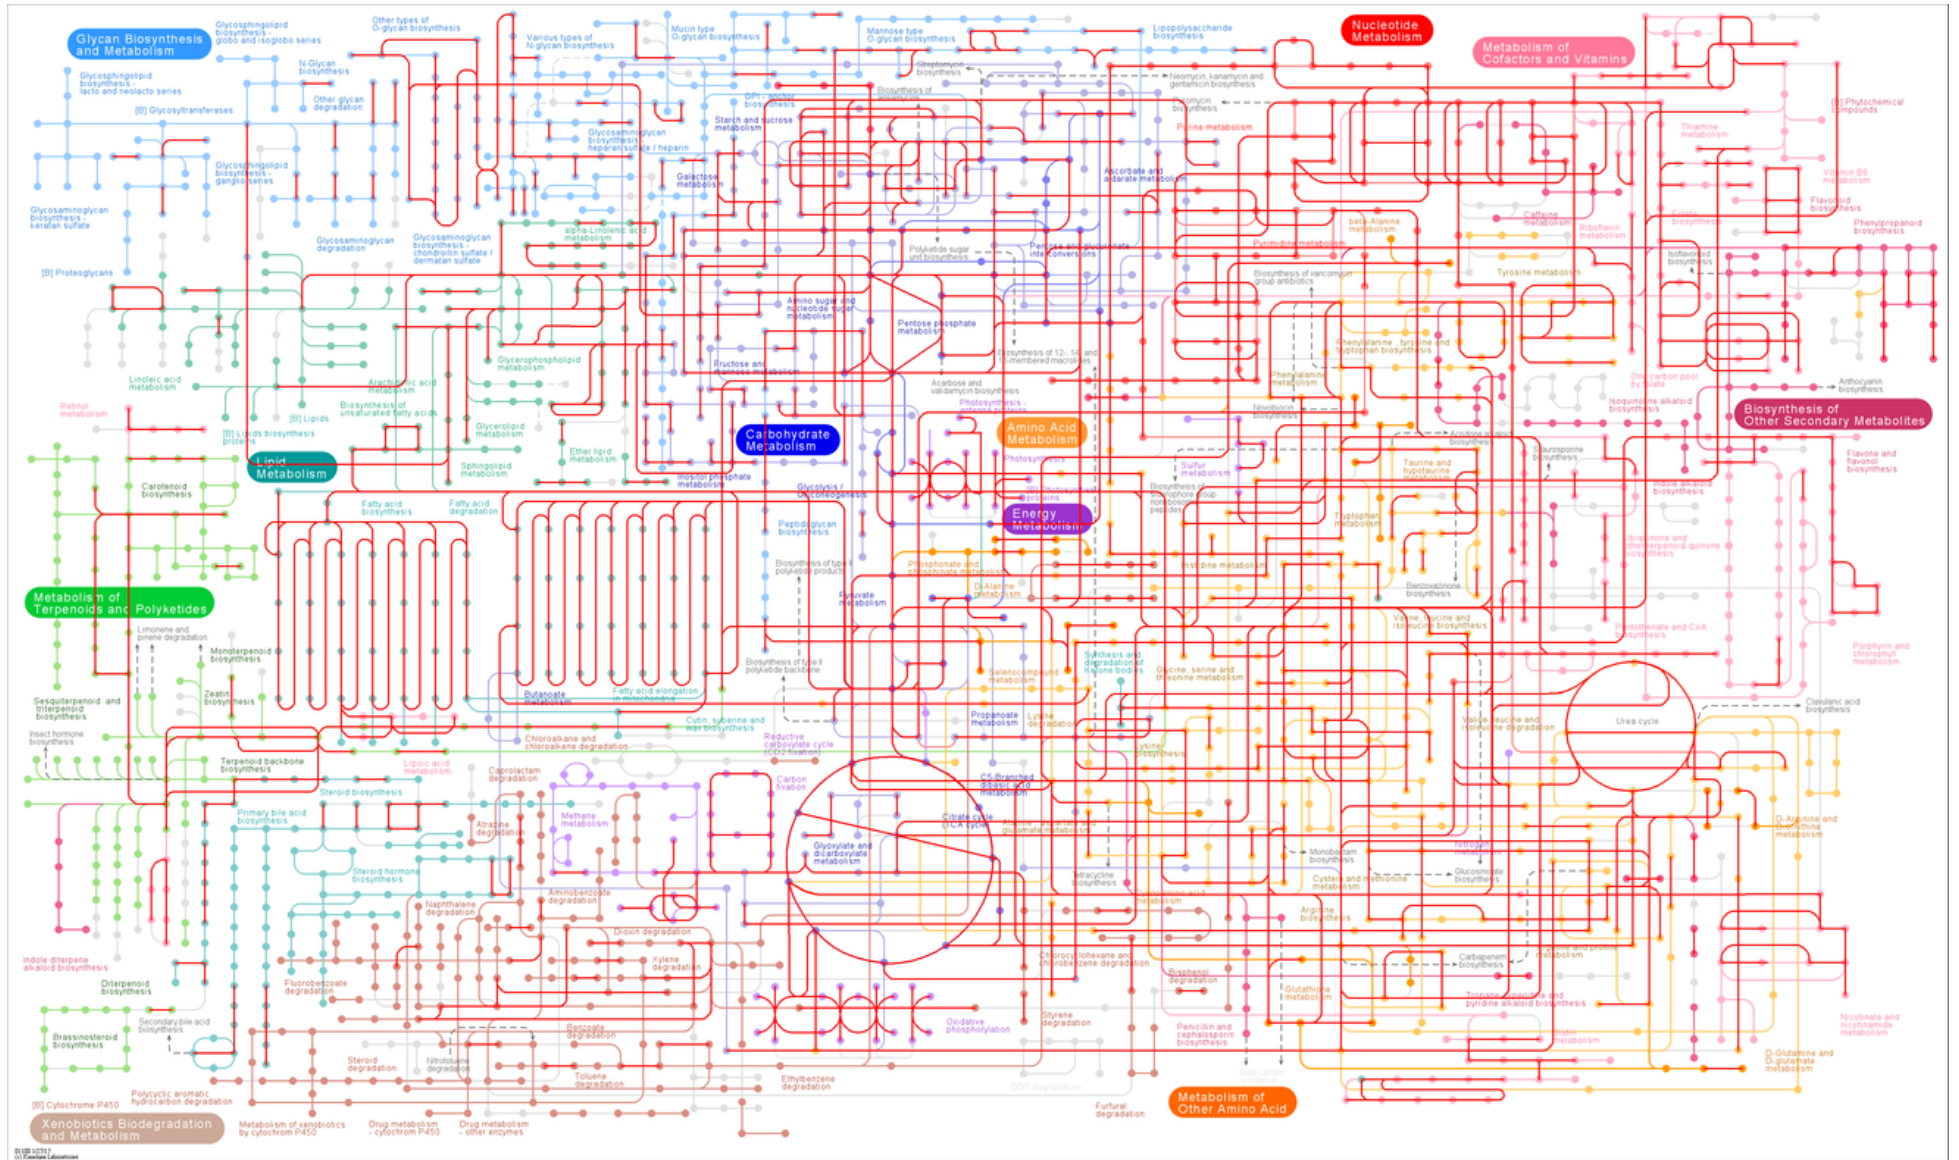

Figure S3. KEGG Map Overview showing all the mapped annotated KO IDs in red.

Supplement: NIHMS74381-supplement-Figure_S3.pdf [file NIHMS74381-supplement-Figure_S3.pdf]
